# Supplementary material for: Association of active fluid de-escalation timing with clinical outcomes in patients with septic shock: a multicenter cohort study
Source: Research Square preprint supplement (doi:10.21203/rs.3.rs-8247207/v1), 2025-12-11
Supplement: Supplementary file 1 [file 0cc98540503883a79e603fa7.docx]

**Association of active fluid de-escalation timing with clinical outcomes in patients with septic shock: a multicenter cohort study**

Ruoyu Zhuang MS1,2#, Rui Tian MD3#, Ruoming Tan MD, PhD3, Danfeng Dong PhD 1, Yunzhe Wu BS1, Tong Wu MD3,4*, Hongping Qu MD, PhD 3,5*, Xiaoli Wang MD, PhD 3*

1 Department of laboratory medicine, Ruijin Hospital, Shanghai Jiaotong University School of Medicine, Shanghai 200025, China

2 Department of laboratory medicine, Taicang Loujiang New City Hospital, Suzhou 215400, China

3 Department of Critical Care Medicine, Ruijin Hospital, Shanghai Jiao Tong University School of Medicine, Shanghai 200025, China

4 Shanghai Clinical Research and Trial Center, Shanghai 201210, China

5 College of Health Science and Technology, Shanghai Jiao Tong University School of Medicine, Shanghai 200025, China

#Ruoyu Zhuang and Rui Tian contributed equally to this work.

*Corresponding author. Author order was determined by work allocation.

**Correspondence to:**

Xiaoli Wang; No.197, Ruijin 2nd Road, Shanghai 200025, China; E-mail: [xiaoliwang0714@163.com](mailto:xiaoliwang0714@163.com)

and

Hongping Qu; No.197, Ruijin 2nd Road, Shanghai 200025, China; E-mail: hongpingqu0412@hotmail.com

and

Tong Wu; No.1599, Keyuan Road, Shanghai 201210, China; E-mail: [annie_wutong@foxmail.com](mailto:annie_wutong@foxmail.com)

**Additional File**

**Supplementary tables and figures**

e-**Table 1.** **Unadjusted and adjusted Logistic regression models for 28-day mortality associated with de-escalation after hemodynamic stability.**

| **Variables** | **OR (95% CI)** | **P-value** |
| --- | --- | --- |
| With de-resuscitation (Unadjusted) | 0.63 (0.61, 0.66) | <0.001 |
| Model 1 | 0.58 (0.55, 0.61) | <0.001 |
| Model 2 | 0.91 (0.85, 0.98) | 0.017 |
| Model 3 | 0.84 (0.78, 0.91) | <0.001 |

Model 1 was adjusted for age (per 10 years), gender, ethnicity, CCI and SOFA score on Day 1 after hemodynamic stability. Model 2 was adjusted for variables included in Model 1 and use of colloid or albumin during resuscitation, number of infection sites, volume of overload when hemodynamic stabilized. Model 3 was adjusted for covariates included in Model 2 and whether admitted to ER, with AKI or under MV on Day 1 of hemodynamic stability.

PSM: Propensity Score Matching; CCI: Charlson Comorbidity Index; MV: Mechanical Ventilation; AKI: Acute Kidney Injury; SOFA: Sequential Organ Failure Assessment; ER: Emergency Room; IQR: Interquartile Range; SMD: Standardized Mean Difference.

e-**Table 2. Fluid balance after hemodynamic stability**

| **Characteristics** | **Overall**  **(N = 3796)** | **De-escalation after 24h**  **(N = 1898)** | **De-escalation within 24h**  **(N = 1898)** | ***P*-value** |
| --- | --- | --- | --- | --- |
| Fluid balance on Day 1 after hemodynamic stability, mL, median [IQR] | 1055 [-310, 2818] | 1632 [261, 3635] | 547 [-844, 2037] | <0.001 |
| Fluid balance on Day 2 after hemodynamic stability, mL, median [IQR] | -784 [-18229, 67] | -513 [-1561, 630] | -1013 [-2063, -173] | <0.001 |
| Fluid balance on Day 3 after hemodynamic stability, mL, median [IQR] | -1374 [-2660, -247] | -1071 [-2297, -89] | -1752 [-3013, -477] | <0.001 |
| Accumulated fluid balance on Day 2 after hemodynamic stability, mL, median [IQR] | 229 [-1698, 2418] | 1109 [-862, 3878] | -454 [-2504, 1214] | <0.001 |
| Accumulated fluid balance on Day 3 after hemodynamic stability, mL, median [IQR] | -1246 [-3824, 1462] | -86 [-2525, 2979] | -2309 [-4813, 6] | <0.001 |
| Daily fluid balance within 3 days after hemodynamic stability, mL, median [IQR] | -416 [-1274, 487] | -29 [-842, 993] | -770 [-1604, 2] | <0.001 |

IQR: Interquartile Range.


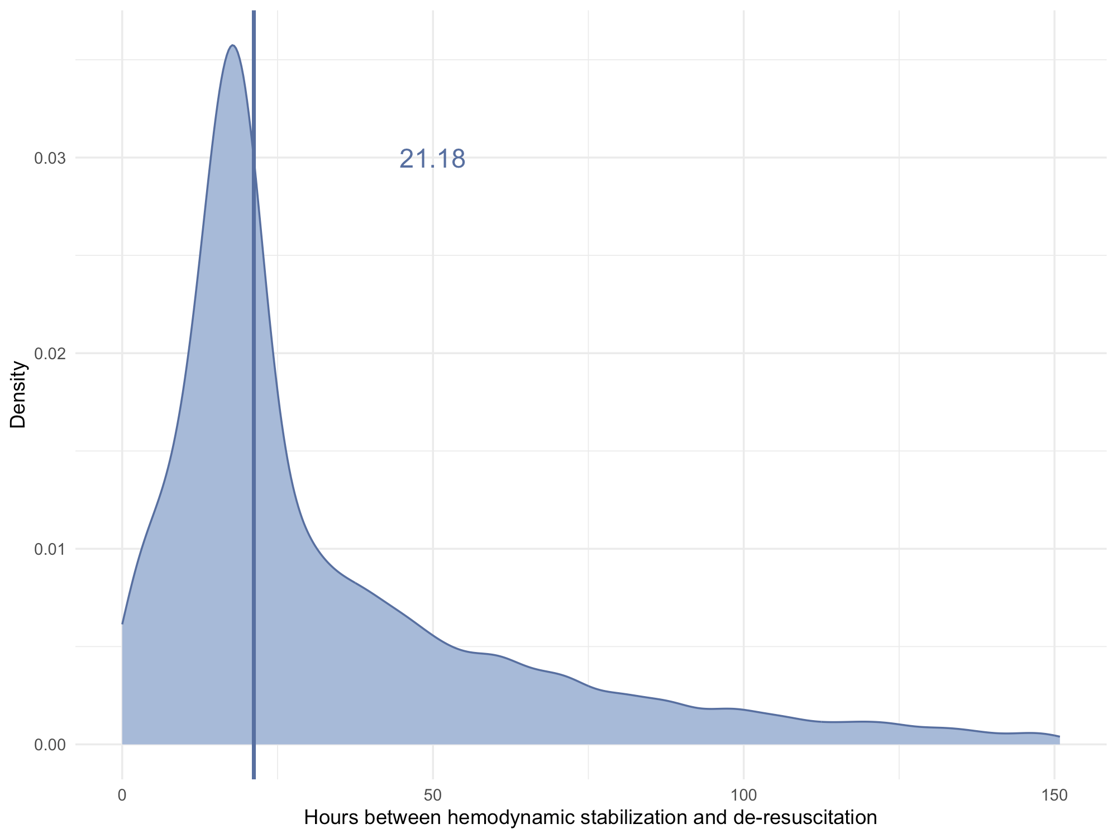


e-Figure 1: Distribution density of hours between hemodynamic stability and de-escalation.


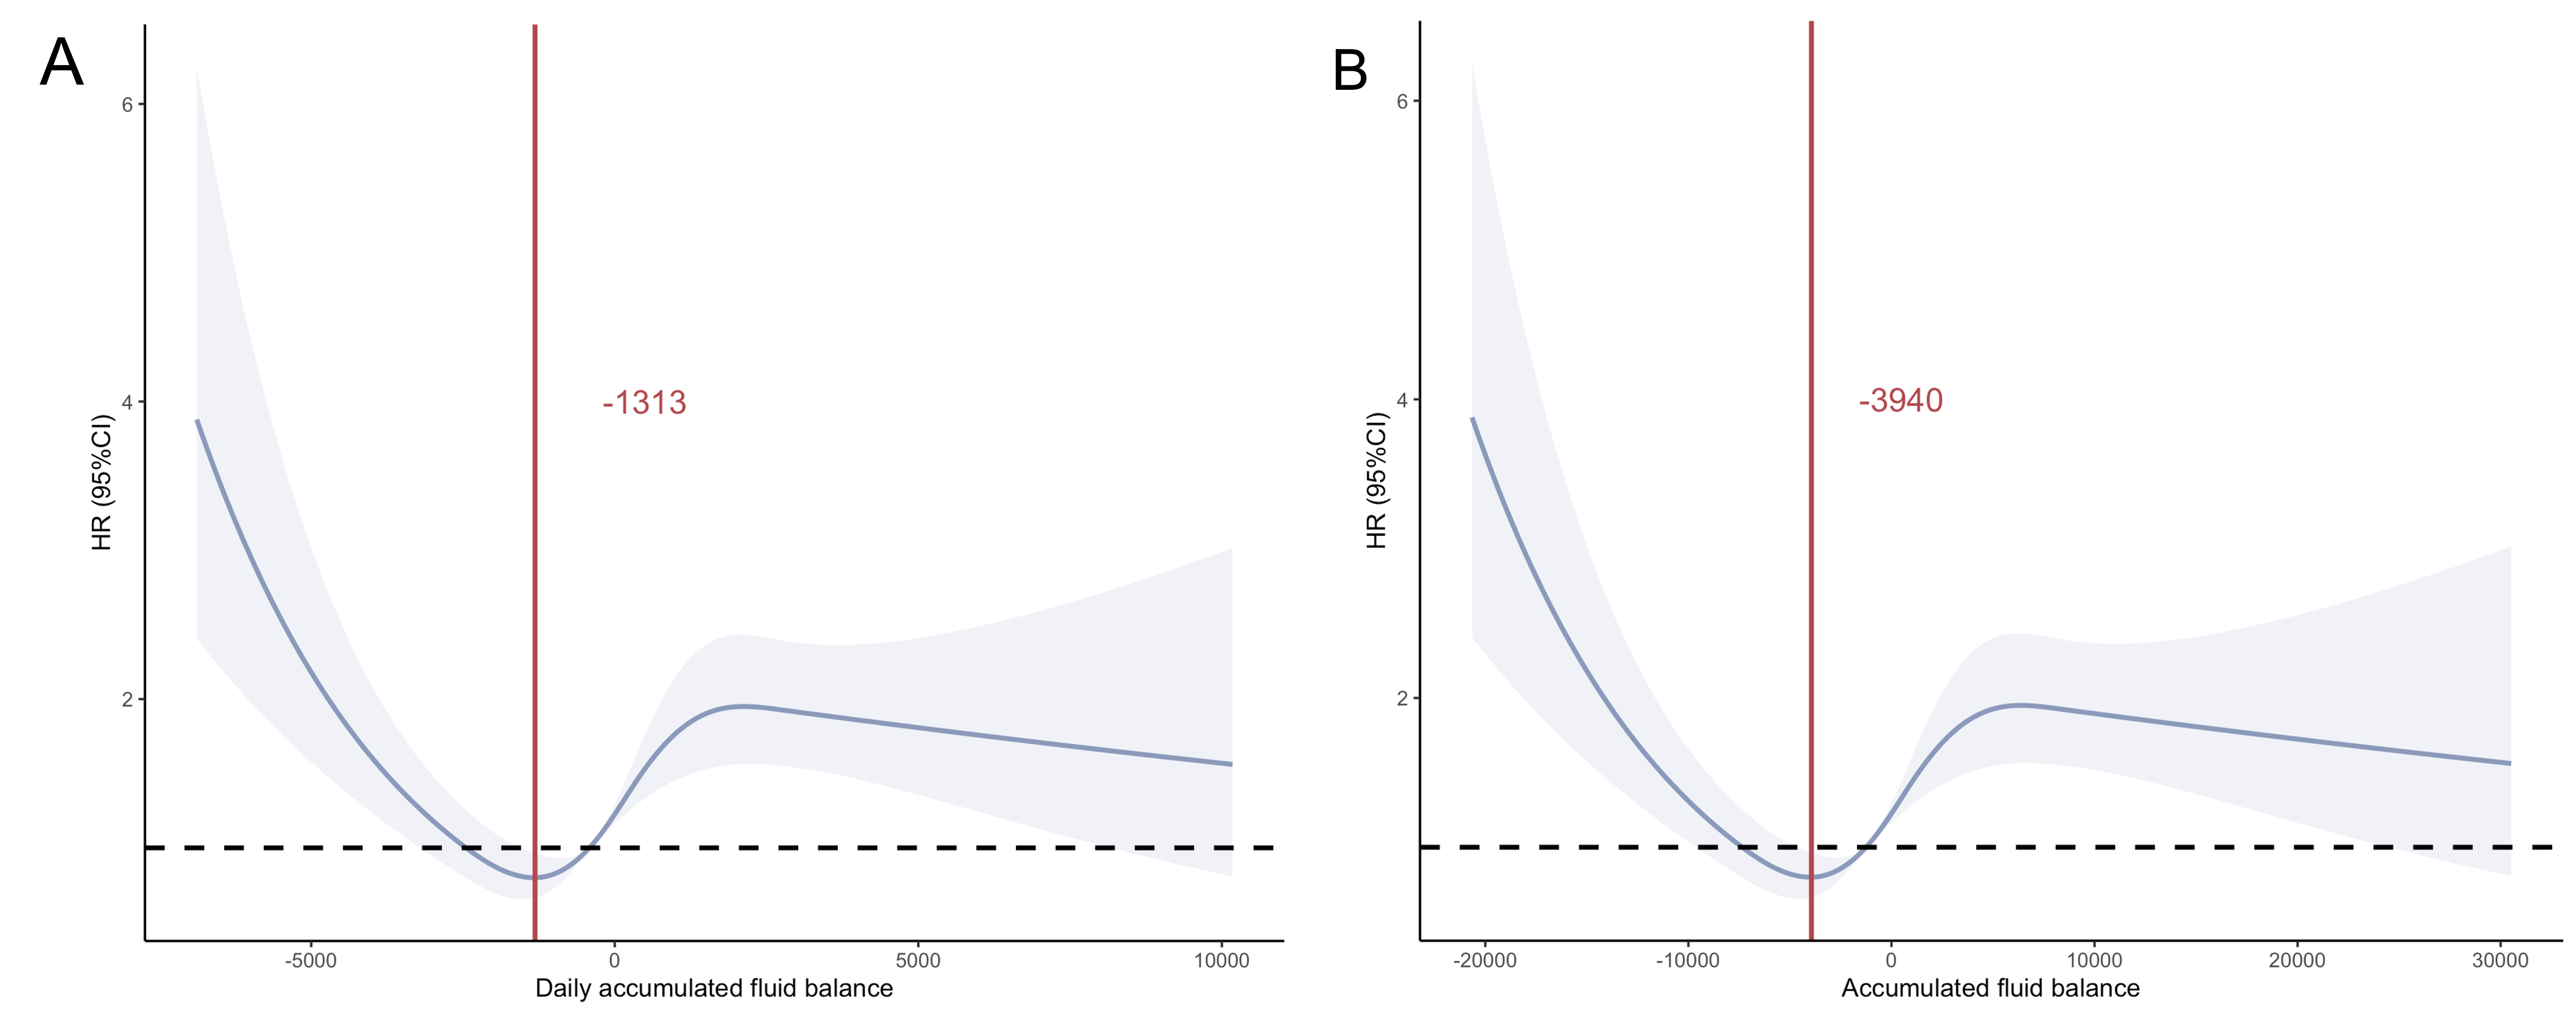


e-Figure 2: Restricted cubic spline of the association between fluid balance within 3 days after hemodynamic stability and stability all-cause mortality in the cohort before propensity score matching. A) The association with daily fluid balance within 3 days after hemodynamic stability and stability all-cause mortality was expressed relative to HR and 95% confidence intervals. Daily fluid balance of -1313mL is associated with the lowest HR for stability all-cause mortality. Daily fluid balance between -2428mL and -456mL were associated with HR for stability all-cause mortality lower than 1. B) The association with accumulated fluid balance within 3 days after hemodynamic stability and stability all-cause mortality was expressed relative to HR and 95% confidence intervals. Accumulated fluid balance -3940mL is associated with the lowest HR for stability all-cause mortality. Accumulated fluid balance between -7284mL and -1368mL were associated with HR for stability all-cause mortality lower than 1.


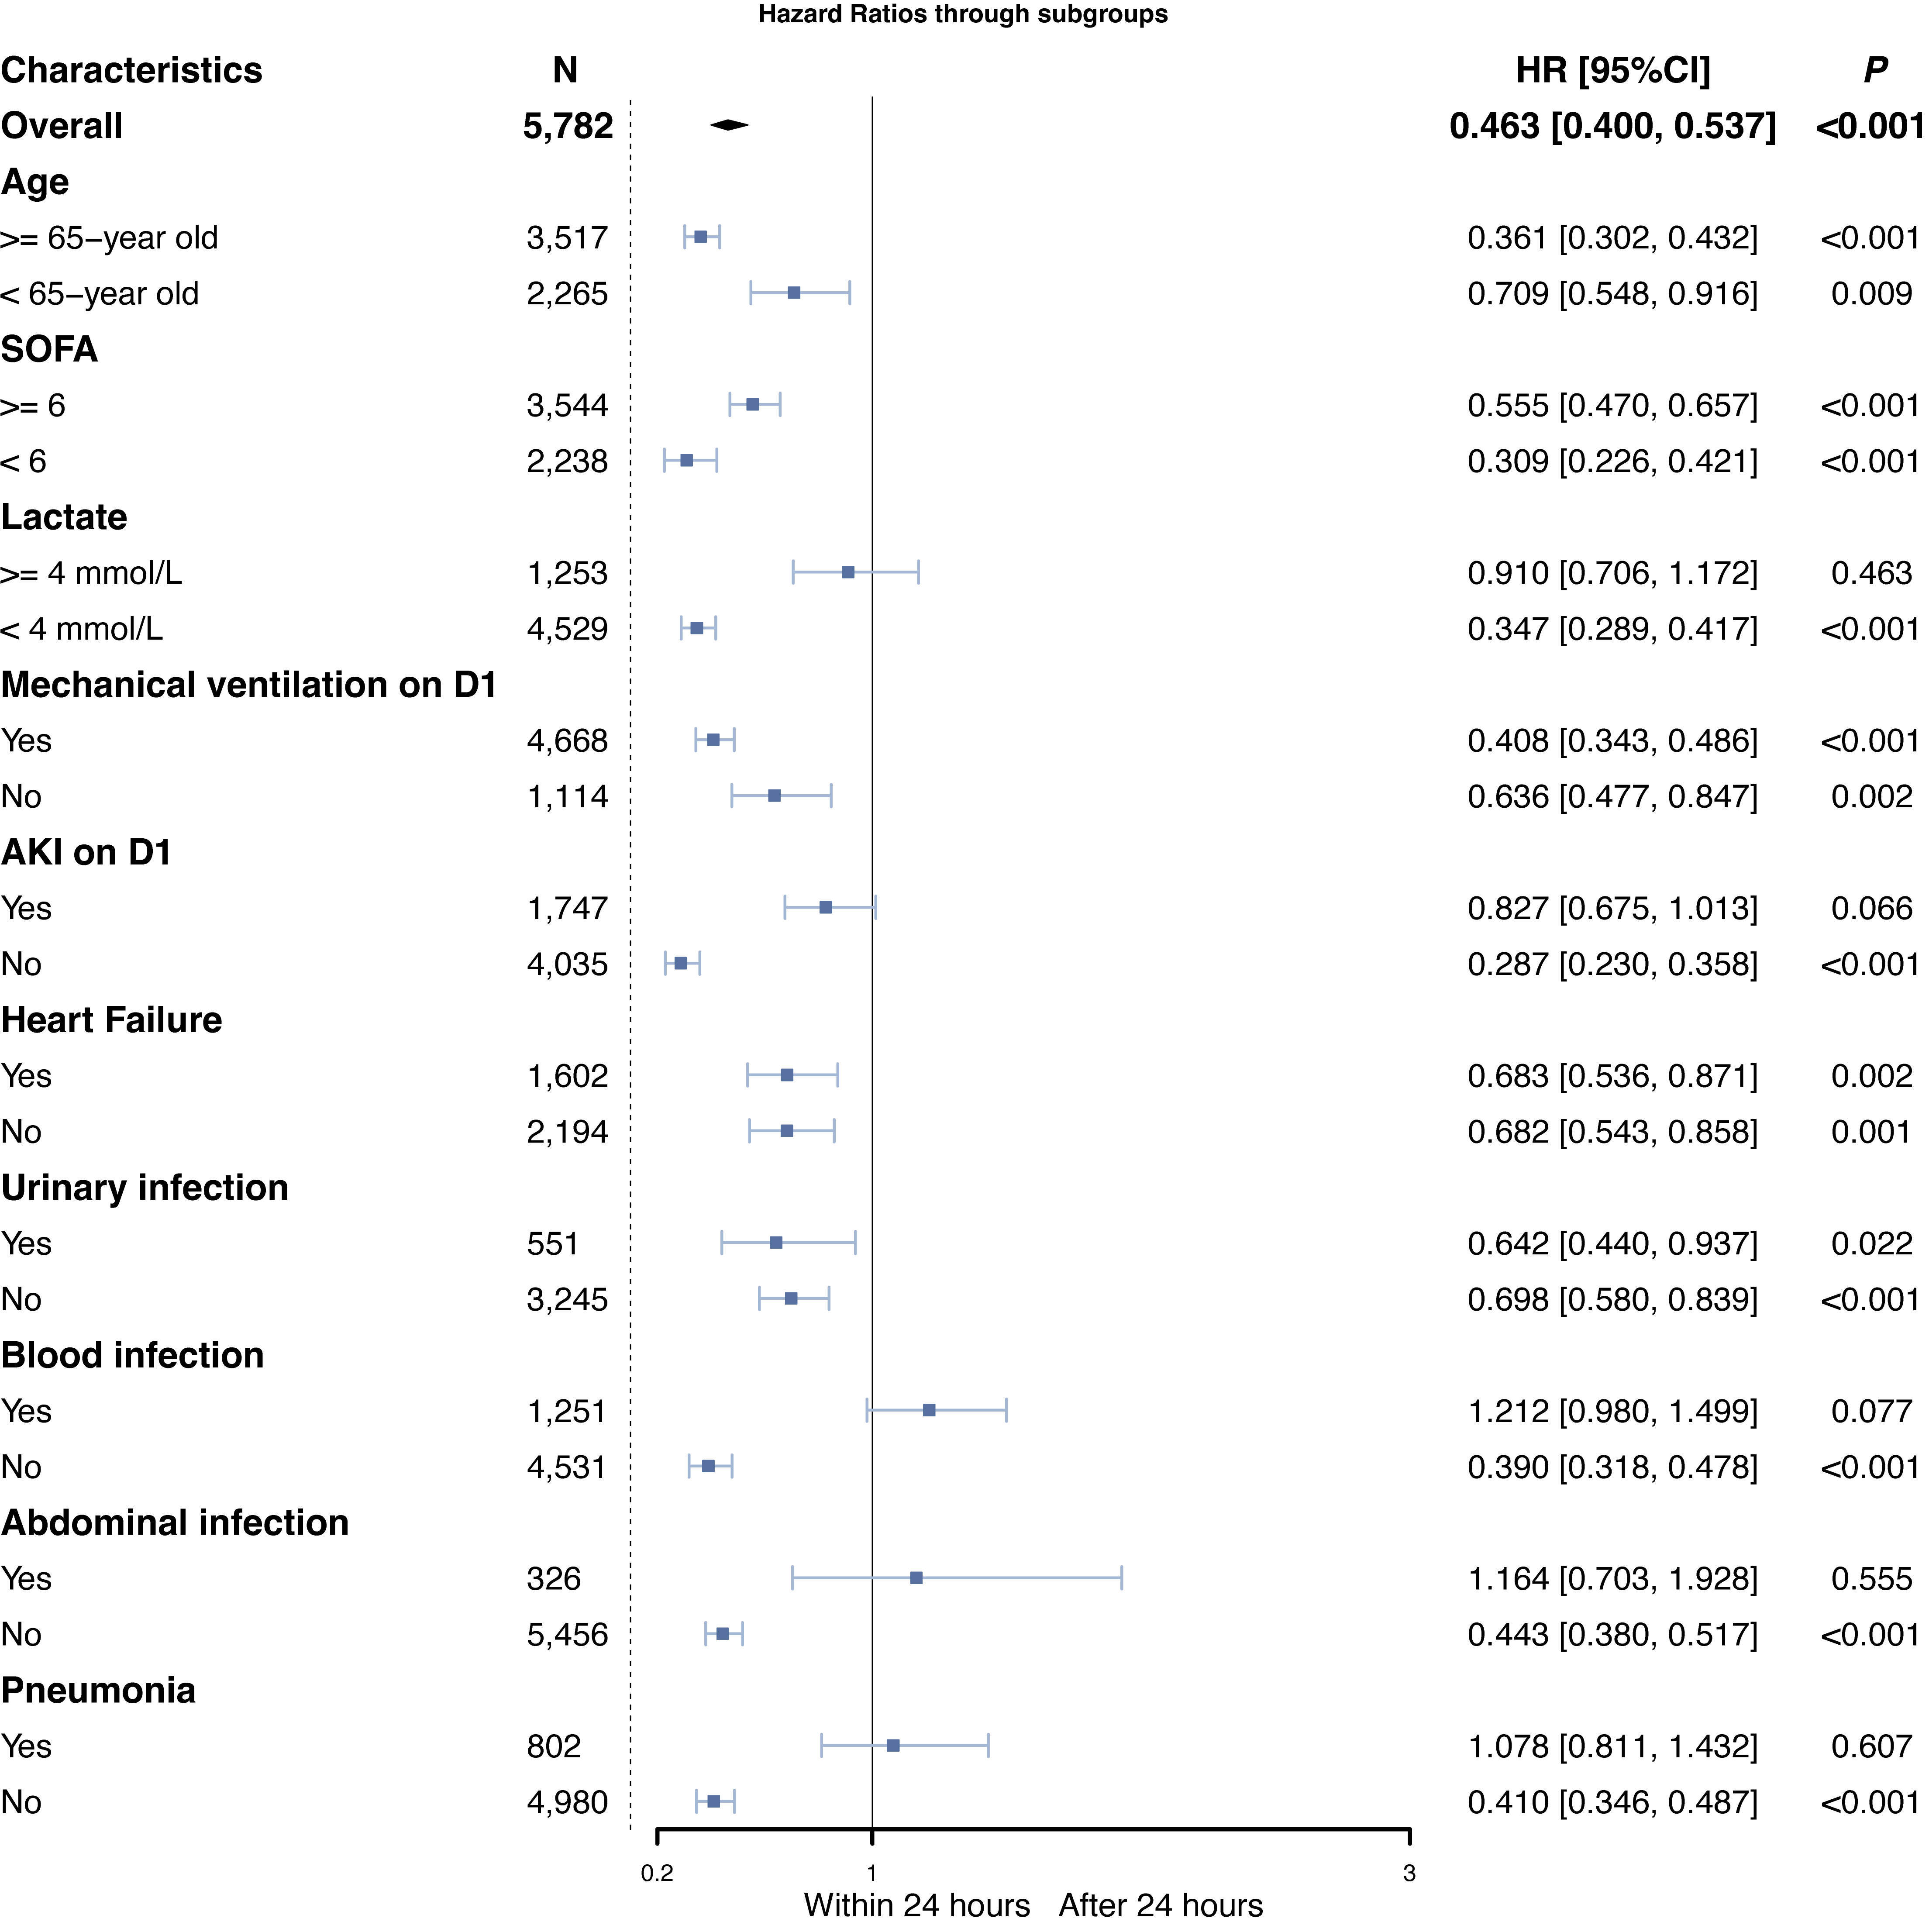


e-Figure 3: Subgroup analysis for 28-day all-cause mortality of patients de-resuscitated within or after 24 hours.
